# Full-length de novo viral quasispecies assembly through variation graph construction

Jasmijn A. Baaijens\*, Bastiaan Van der Roest†, Johannes Köster‡§,  
Leen Stougie\*¶, Alexander Schönhuth\*\*††

## Abstract

Viruses populate their hosts as a viral quasispecies: a collection of genetically related mutant strains. Viral quasispecies assembly is the reconstruction of strain-specific haplotypes from read data, and predicting their relative abundances within the mix of strains, an important step for various treatment-related reasons. Reference-genome-independent (“de novo”) approaches have yielded benefits over reference-guided approaches, because reference-induced biases can become overwhelming when dealing with divergent strains. While being very accurate, extant de novo methods only yield rather short contigs. It remains to reconstruct full-length haplotypes together with their abundances from such contigs. We present Virus-VG as a de novo approach to viral haplotype reconstruction from pre-assembled contigs. Our method constructs a variation graph from the short input contigs without making use of a reference genome. Then, to obtain paths through the variation graph that reflect the original haplotypes, we solve a minimization problem that yields a selection of maximal-length paths that is optimal in terms of being compatible with the read coverages computed for the nodes of the variation graph. We output the resulting selection of maximal length paths as the haplotypes, together with their abundances. Benchmarking experiments on challenging simulated and real data sets show significant improvements in assembly contiguity compared to the input contigs, while preserving low error rates compared to the state-of-the-art viral quasispecies assemblers. Virus-VG is freely available at <https://bitbucket.org/jbaaijens/virus-vg>.

## 1 Introduction

The ensemble of genetically related, but different mutant viral strains that populate infected people are commonly referred to as *viral quasispecies* (Domingo *et al.*, 2012). Each of these strains comes with its own genomic sequence (henceforth referred to as *haplotype*). The final goal of primary viral quasispecies analysis is the reconstruction of the individual haplotypes—optimally at full length—and also to provide estimates of their abundances. The unknown number of different, strain-specific haplotypes and their variance in abundance establish the theoretical issues that characterize viral quasispecies assembly. They explain why this form of assembly is difficult, despite the shortness of virus genomes. These issues are further accentuated by the fact that neither next-generation nor third-generation sequencing reads, by

---

\*Centrum Wiskunde & Informatica, Amsterdam, Netherlands

†University Medical Center Utrecht, Utrecht, Netherlands

‡University of Duisberg-Essen, Essen, Germany

§Dana Farber Cancer Institute, Harvard Medical School, Boston, United States

¶Vrije Universiteit, Amsterdam, Netherlands

|| INRIA-Erable

\*\*Utrecht University, Utrecht, Netherlands

††Corresponding author ([alexander.schoenhuth@cwi.nl](mailto:alexander.schoenhuth@cwi.nl))

their combinations of error rates and length, allow for immediate reconstruction and abundance estimation of haplotypes (Beerenwinkel *et al.*, 2012; Rose *et al.*, 2016).

State-of-the-art approaches currently allow for two options: (i) full-length reconstruction of haplotypes based on statistical, usually *reference genome dependent* measures, or (ii) *de novo* reconstruction of (optimally haplotype-specific) contigs.

Approaches of type (i) assume that the sequencing reads are aligned to a reference genome and make use of model-based clustering algorithms (Zagordi *et al.*, 2011; Barik *et al.*, 2017; Ahn and Vikalo, 2018), Dirichlet process mixture models (Prabhakaran *et al.*, 2014), hidden Markov models (Töpfer *et al.*, 2013), sampling schemes (Prosperi and Salemi, 2012), or combinatorial methods (Knyazev *et al.*, 2018), respectively. However, as was demonstrated in Baaijens *et al.* (2017); Töpfer *et al.* (2014), resorting to external auxiliary means (such as reference genomes) can bias the reconstruction procedure significantly.

Approaches of type (ii) comprise generic (meta)genome assemblers as well as specialized viral quasispecies assemblers, both of which are not helped by external measures (“*de novo*”) hence are not affected by external biases. Metagenome assemblers are designed to reconstruct multiple genomes simultaneously, but in viral quasispecies tend to collapse strains (Rose *et al.*, 2016). It was further shown by Baaijens *et al.* (2017) that among generic *de novo* assemblers SPAdes (Bankevich *et al.*, 2012) was the only approach to identify strain-specific sequences, however only in case of sufficiently abundant strains. *De novo* viral quasispecies assemblers (e.g. Hunt *et al.* (2015); Yang *et al.* (2012)) generally aim at constructing suitable consensus reference genomes, which may serve as a template for more finegrained studies (for example if curated reference genomes have become too divergent, which is a frequent scenario). To the best of our knowledge, the only methods that truly aim at *de novo* viral quasispecies assembly *at strain resolution* are SAVAGE (Baaijens *et al.*, 2017), MLEHaplo (Malhotra *et al.*, 2016) and PEHaplo (Chen *et al.*, 2018). However, the contigs produced by these methods, while strain-specific, in general do not represent full-length haplotypes.

We present Virus-VG, an algorithm that turns strain-specific contigs into full-length, strain-specific haplotypes, thus completing the *de novo* viral quasispecies assembly task. For that, we construct a variation graph from the contigs, without the help of a (curated) reference genome, where we use the contigs from SAVAGE (Baaijens *et al.*, 2017). We obtain full-length haplotypes as a selection of maximal-length paths in the variation graph, each of which reflects a concatenation of subpaths associated with the input contigs. The selected paths are optimal in terms of differences between their estimated abundances and the read coverages computed for the nodes they traverse.

Variation graphs are data structures that have recently become very popular as reference systems for (evolutionarily coherent) collections of genomes (Paten *et al.*, 2017). Using such genome structures instead of standard linear reference genomes has been shown to reduce reference bias (Dilthey *et al.*, 2015; Paten *et al.*, 2017) and to come with a few other, significant advantages (Novak *et al.*, 2017; Rosen *et al.*, 2017). Methods presented for constructing variation graphs so far, however, mostly require a linear reference genome as a point of departure. Here, we point out how to construct variation graphs *de novo*, by first sorting the contigs in an appropriate way and then making use of progressive multiple alignment techniques (`vg msga`, part of the `vg toolkit` by Garrison *et al.* (2017)). In this, we present an approach for full-length, high-quality reconstruction of the haplotypes of a viral quasispecies that is *entirely de novo*, which, to the best of our knowledge, is a novelty.

Our method depends on the enumeration of maximal-length paths in a variation graph, whose number is exponential in the number of nodes of the graph. However, since all these paths enumerated are to respect the subpaths associated with the input contigs, their number will decrease on increasing contig length. Thanks to advances in sequencing technology, input contig length will inevitably increase, which points out that our method, as per its design, will be able to deal with future technological developments smoothly.

Benchmarking experiments demonstrate that Virus-VG yields substantial improvements over the input contigs assembled with SAVAGE in terms of spanning the full length of the haplotypes. Thereby, the increase in length comes at negligible or even no losses in terms of sequential

accuracy. Further, we find our strain abundance estimates to be also highly accurate. Finally, we find our method to (substantially) outperform alternative approaches, all of which are reference based—we recall that there are no alternative de novo approaches so far—both when working with bootstrap and curated reference genomes.

*Note on Related Work: RNA Transcript Assembly.* The problem of RNA transcript assembly has been cast in terms of variations of minimum path cover optimization problems that are—regarding a few relevant aspects—similar in spirit to the optimization problem we formulate (Bernard *et al.*, 2014; Pertea *et al.*, 2015; Rizzi *et al.*, 2014; Tomescu *et al.*, 2013; Trapnell *et al.*, 2010). Most importantly, Rizzi *et al.* (2014) introduce node and edge abundance errors and Tomescu *et al.* (2013) show a minimum path cover with subpath constraints to be polynomially solvable. However, to the best of our knowledge, no method simultaneously employs both subpath constraints *and* abundance error minimization in its problem formulation. Moreover, applying these RNA transcript assemblers to the viral quasispecies problem is not so straightforward: a collection of reference genomes representing all possible haplotypes is required as input, while in our setting such information is not available.

## 2 Methods

**Notation.** A *variation graph*  $(V, E, P)$  is a directed graph that is constructed from a set of input sequences, which represent members of a (evolutionarily coherent) population of sequences. Each node  $v \in V$  is assigned to a subsequence  $\text{seq}(v)$ . An edge  $(u, v) \in E$  indicates that the concatenation  $\text{seq}(u)\text{seq}(v)$  is part of one of the input sequences.  $P$  is a set of paths (a sequence of nodes linked by edges) that represent genome-specific sequences; thereby,  $P$  can, but need not, represent the input sequences themselves. A node  $v \in V$  with no incoming edges is called *source*. A node  $v \in V$  with no outgoing edges is called *sink*.

**Workflow.** Our method consists of two basic steps:

- (1) The computation of a **contig variation graph**  $VG' = (V', E', P')$  where each path  $p \in P'$  represents an input contig. We refer to the path representing contig  $c$  as  $p(c)$ . Together with  $VG'$ , we compute a function  $a' : V' \rightarrow \mathbb{R}$  where  $a'(v')$  for  $v' \in V'$  represents the abundance of an individual node, measured by the amount of original reads (from which the contigs were computed) that align to  $\text{seq}(v')$ .
- (2) The transformation of  $VG'$  into a **genome variation graph**  $VG = (V, E, P)$  where each path  $p \in P$  reflects a full-length haplotype. We also compute a function  $a : P \rightarrow \mathbb{R}$  where  $a(p)$  for  $p \in P$  reflects the abundance of the haplotype represented by  $p$ . The set of paths  $P$  together with their abundances  $a(p)$  establish the final output of our method.

The input for determining  $VG'$  in (1) are the contigs. For computation of  $a'$ , we make use of the original reads from which the input contigs were computed; one can determine the abundance  $a'(v')$  of single node  $v' \in V'$  as the (length normalized) count of reads whose alignments touch upon  $v'$ .

The input for computation of  $VG$  and  $a$  in (2) are  $VG'$  and  $a'$ . Since  $V \subseteq V'$  and  $E \subseteq E'$ , as will become clear later, we can apply  $a'$  also to nodes in  $VG$ . The computation of  $VG$  is established as the solution of an optimization problem that aims to determine full-length paths (paths formed by a concatenation of contigs of maximal length) such that the difference of path abundances  $a(p)$  and node abundances  $a'(v)$  for paths  $p$  of which  $v$  makes part is minimal. We emphasize here that the numbers  $a'(v)$  can be directly computed from the input, whereas the  $a(p)$ 's correspond to decision variables in an optimization problem.

We will describe the construction of the contig variation graph (1) in full detail in Section 2.1. The transformation into the (final) genome variation graph (2) is divided into two steps: (a) the *enumeration of candidate paths*, which is described in Section 2.2.1, and (b) the *solution of an optimization problem* that aims at selecting a subset of candidate paths through their path abundance values which are optimal in terms of being compatible with node abundances in Section 2.2.2. The complete workflow is illustrated in Figure 1.

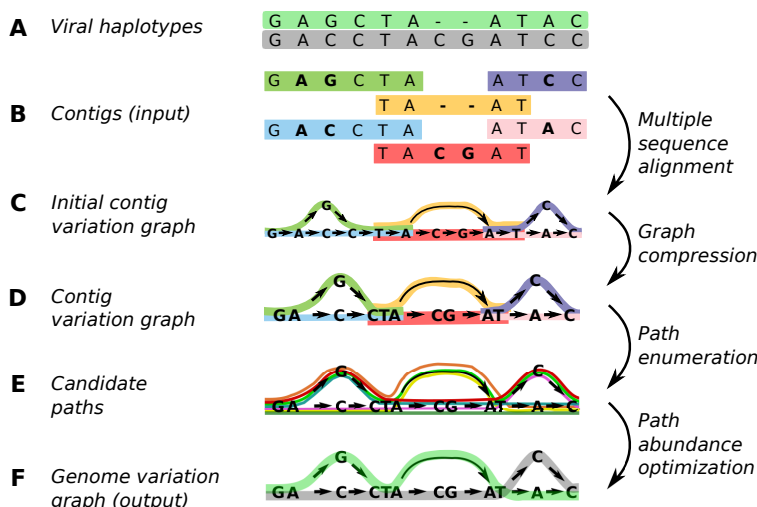

Figure 1: Virus-VG workflow.

## 2.1 Contig variation graph construction

**Input.** The input is a data set of next-generation sequencing reads and a set of contigs assembled from them, for which we use the specialized de novo viral quasispecies tool SAVAGE (Baaijens *et al.*, 2017). We assume that there are no contigs which are an exact subsequence of another contig, which applies for SAVAGE (and commonly applies for the output of many assembly programs). The contig variation graph with its node abundances is constructed in three steps.

**Step 1: Multiple Sequence Alignment (MSA).** We construct the initial contig variation graph by building an MSA of the contigs using `vg msga` (Garrison *et al.*, 2017), which progressively combines long sequences into a variation graph. For this construction to work on a collection of contigs that do not all cover the same region, the order in which the contigs are aligned and added to the graph is crucial. Here, we sort the contigs by starting with the longest contig, then iteratively selecting the contig with longest possible overlap with any of the previously selected contigs, until all contigs have been selected. For finding all pairwise overlaps between contigs we use `minimap2` (Li, 2018). Determining the best sorting heuristic in terms of speed and quality is subject to future work. After sorting the contigs, we apply `vg msga`; the resulting MSA is represented as a variation graph and for every contig the corresponding path through the graph is stored.

**Step 2: Compression and contig-path construction.** We compress the initial contig variation graph similar to the construction of a compressed de Bruijn graph (Mäkinen *et al.*, 2015). The absence of branches on a path ensures that every source-sink path has to traverse it at full length. Therefore, each non-branching path  $(v_{i_1}, \dots, v_{i_k})$  can be merged (contracted) into a single node  $v'_i$ , with in-neighbors  $N^-(v'_i) = N^-(v_{i_1})$  and out-neighbors  $N^+(v'_i) = N^+(v_{i_k})$ . Also the contributing contig sets of  $v_{i_1}, \dots, v_{i_k}$  are taken together and stored in the new node  $v'_i$ . Note that after this step, a node can represent a sequence instead of a single nucleotide.

In addition, we determine for each contig  $c$  the sub-path  $p(c)$  in this (compressed) graph that represents  $c$ . Let  $p(c) = (v_{i_1}, \dots, v_{i_k})$  be this sub-path. Note that due to the compression step, the sequence  $\text{seq}(c)$  represented by a contig  $c$  might only be a subsequence of its path sequence  $\text{seq}(v_{i_1}) \dots \text{seq}(v_{i_k})$ . However, this does not bear any consequence on the definition of any haplotype the contigs make part of.

The resulting compressed graph, together with the contig paths  $P'$  is our contig variation graph  $VG' = (V', E', P')$ , illustrated in Figure 1, panel D.

**Step 3: Node abundance.** We finally compute  $a' : V' \rightarrow \mathbb{R}$ , which assigns *node abundances*  $a'(v')$  to nodes  $v' \in V'$  of the contig variation graph. These node abundances  $a'(v')$  reflect the *average base coverage* of the piece of sequence  $\text{seq}(v')$ . For computation of  $a'(v')$  we make further use of the `vg-toolkit` (Garrison *et al.*, 2017), which allows to align the original sequencing reads to our contig variation graph. The abundance  $a'(v')$  is calculated as the sum of all bases in all reads that align with  $\text{seq}(v')$ , divided by the length of  $\text{seq}(v')$ .

## 2.2 From contig to genome variation graph

The input for the following procedure is the contig variation graph  $VG' = (V', E', P')$  together with  $a' : V' \rightarrow \mathbb{R}$  that we have just described. The procedure for constructing the *genome variation graph*  $VG = (V, E, P)$  from  $VG'$  and  $a'$  consists of three steps. *First*, we compute a set of *candidate paths*, which are all maximal length paths in  $(V', E')$  that are “concatenations” of paths from  $P'$ . *Second*, we select a subset of candidate paths that are optimal with respect to a *minimization problem*, which provides us with the final, maximal-length paths  $P$  and path abundances  $a : P \rightarrow \mathbb{R}$ . *Third*, we remove nodes and edges from  $(V', E')$  that are not traversed by paths from  $P$ , which yields the final graph  $(V, E)$ . Since only paths in  $P$  are supposed to reflect true haplotypes, it is reasonable to assume that any node not being included in a haplotype is a sequencing artifact. The third step is a straightforward procedure. We will describe the first two steps in more detail in the following.

### 2.2.1 Candidate path generation.

The goal is to compute the set of all paths through  $(V', E')$  that are maximal-length *concatenations* of paths from  $P'$ , where we understand a concatenation of two paths as the merging of them along a common substring. Thereby, this common substring is a suffix of the first path and a prefix of the second path. We will refer to these paths as *candidate paths*  $P_{\text{cand}}$  in the following (see also Figure 1, Panel E). Generating candidate paths happens in five steps outlined below.

**Step 1: Trimming paths  $p \in P'$ .** Due to common issues in contig computation, uncorrected sequencing errors are often located on the extremities of the contig. We therefore shorten all paths  $p \in P'$  by their extremities and remove the tails if these contain nodes  $v'$  for which  $a'(v')$  is below a given threshold. By default, we allow to trim paths  $p \in P'$  by a removal of nodes that together amount to no more than  $\tau = 10\text{bp}$  on either end.

**Step 2: Enumerating pairwise concatenations.** We allow concatenating pairs of paths with matching suffix-prefix pairs. In more detail, let  $p_1, p_2 \in P'$ , represented by series of nodes  $(u_1, \dots, u_m)$  and  $(v_1, \dots, v_n)$  from  $V'$ . Then  $p_1$  can be concatenated with  $p_2$ , written  $p_1 \rightarrow_c p_2$ , if for some  $l$  we have  $u_{m-l+1} = v_1, u_{m-l+2} = v_2, \dots, u_m = v_l$ , that is, the suffix of length  $l$  of  $p_1$  matches the prefix of length  $l$  of  $p_2$ .

In order to enable correction of persisting sequencing errors, we further consider to concatenate pairs of paths  $p_1, p_2$  which do have one or more non-matching nodes, but only under the following condition. Let  $u^* := u_{m-l+i} \neq v_i =: v^*$  be the respective non-matching nodes in  $p_1, p_2$  respectively, then only if  $\min\{a'(u^*), a'(v^*)\} < \alpha$ , where  $\alpha$  is a user-defined threshold, we concatenate  $p_1$  and  $p_2$ . This threshold reflects the minimal node abundance  $a'(v)$  for which we trust node  $v$ ; for more details, see Appendix A.

**Step 3: Removing concatenations lacking physical evidence.** Subsequently, we remove concatenations  $p_1 \rightarrow_c p_2$  if there are  $q_1, q_2$  such that  $q_1 \rightarrow_c q_2, q_1 \rightarrow_c p_2, q_2 \rightarrow_c p_2$ , but there is no  $q_3$  for which  $p_1 \rightarrow_c q_3$  and  $q_3 \rightarrow_c p_2$  and there is  $q_4$  such that  $p_1 \rightarrow_c q_4$ . The situation reflects that the concatenation of paths  $q_1 \rightarrow_c p_2$  enjoys corroborating physical evidence, provided by  $q_2$ , while there is no such corroborating evidence for the concatenation



$p_1 \rightarrow_c p_2$ . At the same time,  $p_1$  concatenates well with  $q_4$  such that the removal of  $p_1 \rightarrow_c p_2$  does not turn  $p_1$  into a dead end.

**Step 4: Enumerating maximal length paths  $P_{\text{cand}}$ .** In this step, the pairwise concatenations from step 2 that remain after step 3 are combined to paths of maximal length. This is achieved through a breadth-first search type procedure. We maintain a set of *active paths*  $P_{\text{act}}$ , which is the set of paths to be extended in the current iteration. We also maintain a set of *maximal paths*  $P_{\text{max}}$  that reflects the set of maximal length paths collected.

1. **Initialization:** We determine all  $p \in P'$  for which there are no  $q \rightarrow_c p$  and put them both into  $P_{\text{act}}$  and  $P_{\text{max}}$ .
2. **Iteration:** We replace each  $p \in P_{\text{act}}$  with all  $q \in P'$ , for which  $p \rightarrow_c q$  without  $q^*$  such that  $p \rightarrow_c q^* \rightarrow_c q$ . Simultaneously, we extend each  $\hat{p} \in P_{\text{max}}$  that ends in  $p$ , by appending  $q$  (while respecting the overlap). In case  $q$  is already part of  $\hat{p}$ , we do not append  $q$  to  $\hat{p}$  but instead add  $q$  as a new path to  $P_{\text{max}}$ , thereby breaking any possible loops due to repetitive elements.
3. **Output:** If for all  $p \in P_{\text{act}}$  there are no  $q$  with  $p \rightarrow_c q$ , we output  $P_{\text{max}}$  as our candidate path set  $P_{\text{cand}}$ .

The enumeration algorithm lists all candidate paths in time linear in the output size, which, however, may be exponential in the number of paths  $p \in P'$ .

**Step 5: Correcting paths for errors.** After enumerating all candidate paths, we apply a final correction step to every such path. Since we allow concatenating paths from  $P'$  where suffix-prefix pairs do not match in all nodes (see Step 2), we may have positions in candidate paths where contig paths  $p \in P'$  make ambiguous statements. All such ambiguous positions refer (by construction) to low abundance nodes  $v'$  (i.e.,  $a'(v') < \alpha$ ). We resolve the ambiguity by selecting the node  $v^*$  from all contributing paths  $p \in P'$  with maximal abundance  $a'(v^*)$ .

### 2.2.2 Minimization for haplotype selection and abundance estimation

**Input.** For this final part of the method, the input is the set of candidate haplotype paths  $P_{\text{cand}}$  and the node abundances  $a'(v)$ . In general this set of paths is much larger than the actual number of haplotypes, so  $P_{\text{cand}}$  will contain many false haplotypes. Here we filter them out by estimating the abundance  $a(p)$  for each path (haplotype)  $p \in P_{\text{cand}}$  through solving a minimization problem. In a subsequent step, haplotype paths with an abundance of (almost) zero will be removed as being most likely false haplotypes. This leaves the set of haplotypes to be output.

**Determining path abundances  $a(p)$ .** We determine path abundance values  $a(p)$  for every  $p \in P_{\text{cand}}$ , such as to minimize the sum of or, equivalently, the average of node abundance errors. Let  $f(x, y)$  be an error function to be chosen later. Then for node  $v$  the node abundance error is defined as the value of  $f(x, y)$  with  $x$  the node abundance  $a'(v)$  and  $y$  the sum of the abundances of the haplotype paths going through the node  $v$ , which is  $\sum_{p \ni v} a(p)$ . Recall that the node abundance values  $a'(v)$  are obtained from read alignments to the contig variation graph (Section 2.1, Step 3). The objective then becomes minimizing the sum of the node abundance errors over all nodes  $v \in V'$ :

$$\min \sum_{v \in V'} f \left( a'(v), \sum_{p \ni v} a(p) \right).$$

We need to add non-negativity constraints  $a(p) \geq 0$  on the path abundances. Since we have already taken all subpath constraints into account when enumerating the candidate haplotype paths, the minimization problem does not need any further constraints.

Note that the effectiveness of this objective function depends heavily on the error function used as well as the correctness of node abundances  $a'(v)$ . These abundance values are not

exact measurements, but based on read alignments to the graph as described above; coverage fluctuations can thus lead to under- or overestimated node abundance values. In this case, a simple linear objective function is preferred over a quadratic error function, because the former allows big errors in certain nodes to be compensated by small errors in other nodes. We also observed that normalizing the errors w.r.t. the true node abundance does not improve results, because this means that errors in nodes with low abundance values are penalized very strongly. For this reason, we use the error function  $f(x, y) = |x - y|$  in our objective and the optimization problem becomes

$$\min \sum_{v \in V'} \left| a'(v) - \sum_{p \ni v} a(p) \right| \quad \text{s.t. } 0 \leq a(p) \quad \forall p \in P_{\text{cand}}. \quad (1)$$

This is a convex programming formulation, which can, by a standard trick, easily be linearized and solved using the LP solver from the Gurobi Optimizer<sup>1</sup>.

**Output: haplotype selection and final abundances.** The outcome of the minimization problem (1), yields for each  $p \in P_{\text{cand}}$  an optimal abundance value  $a^*(p)$ . We now select the set of haplotype paths as output of the procedure, by removing any haplotypes with an estimated abundance below a user defined threshold  $\gamma$ . In other words, as output we give the set  $P = \{p \in P_{\text{cand}} \mid a^*(p) \geq \gamma\}$  (Figure 1, panel F). After this haplotype selection step, we redo the optimization step on the selected haplotype paths (prefixing  $a(p)$  to 0 for every path  $p$  with  $a^*(p) < \gamma$ ), thus ensuring that our final abundance estimates are as accurate as possible.

**Note on related work.** The minimization problem we are treating here can be considered as a combination of problems presented in Rizzi *et al.* (2014) and Tomescu *et al.* (2013). The combination of these problems would require an unambiguous way to have subpath abundances contribute to cumulative abundances on the nodes. It is not immediately evident how to do so. In our setting it is straightforward how path abundances  $a(p)$  contribute to the estimated abundances of the nodes on the paths. Exploring these relationships is interesting future work.

## 3 Results

We present results for Virus-VG on three challenging simulated data sets and one gold-standard (real) benchmark. We compare our method with the viral quasispecies assemblers ShoRAH (Zagordi *et al.*, 2011) and PredictHaplo (Prabhakaran *et al.*, 2014), which are widely approved and state-of-the-art in terms of full-length reconstruction of viral haplotypes. Although a comparison to the RNA transcript assemblers from Rizzi *et al.* (2014) and Tomescu *et al.* (2013) would be interesting, this is not so straightforward: these methods require as input a collection of reference genomes representing all possible transcripts (or in our case, viral haplotypes). Since we do not have such information, we could not apply these methods to our data.

For parameters to be set, guidelines, their default choices, and further reasoning, see Appendix A in the Supplementary Material. For an analysis of runtime and memory usage of Virus-VG, see Appendix B in the Supplementary Material.

### 3.1 Data sets

For evaluating correctness of our algorithm and benchmarking experiments, we selected the two most challenging simulated data sets (HCV, ZIKV) presented by Baaijens *et al.* (2017) and generated one additional data set (Poliovirus). These data sets represent typical viral quasispecies ultra-deep sequencing data and consist of 2x250bp Illumina MiSeq reads which were simulated using SimSeq<sup>2</sup>. In addition to simulated data, we also consider a real Illumina MiSeq data set commonly used for benchmarking, referred to as the *labmix*.

<sup>1</sup><http://www.gurobi.com>

<sup>2</sup><https://github.com/jstjohn/SimSeq>

*10-strain HCV mixture.* This is a mixture of 10 strains of Hepatitis C Virus (HCV), subtype 1a, with a total sequencing depth of approximately 20,000x (i.e. 400,000 reads). The haplotypes were obtained from true HCV genomes in the NCBI nucleotide database and have a pairwise divergence varying from 6% to 9%. Paired-end reads were simulated at relative frequencies between 5% and 13% per haplotype, i.e., a sequencing depth of 1000x to 4600x per haplotype.

*15-strain ZIKV mixture.* This is a mixture of 15 strains of Zika Virus (ZIKV), consisting of 3 master strains extracted from the NCBI nucleotide database and 4 mutants per master strain. The pairwise divergence varies between 1% and 12% and the reads were simulated at relative frequencies varying from 2% to 13.3%. The total sequencing depth for this data set is again 20,000x.

*6-strain Poliovirus mixture.* This is a mixture of 6 strains of Poliovirus (type 2), with a total sequencing depth of approximately 20,000x. The haplotypes were obtained from true Poliovirus genomes from the NCBI database (see Appendix C in the Supplement). Paired-end reads were simulated at exponentially increasing relative frequencies of 1.6% to 50.8%.

*Labmix.* This is a real Illumina MiSeq (2x250 bp) data set with an average coverage of 20,000x, sequenced from a mixture of five known HIV strains (HXB2, NL4-3, 89.6, YU2, JRCSF) with relative strain frequencies between 10% and 30%. This data set was presented as a gold-standard benchmark by Di Giallonardo *et al.* (2014) and is publicly available<sup>3</sup>. Currently, predictions of all methods, including our own, are hampered by highly repetitive regions such as the long terminal repeats on the HIV genome; see also Baaijens *et al.* (2017). Hence, we decided to remove these a priori by excluding any reads that map to these known repeat sequences. Note that with the advent of long read sequencing technologies, it is likely that this problem disappears in the future.

### 3.2 Assembly evaluation criteria

We use QUAST (Gurevich *et al.*, 2013) for evaluating our experiments and report the number of strains (or contigs), the fraction of the target genomes that was reconstructed, the N50 and NGA50 measures, and observed error rates. Here, the target genome consists of all true haplotypes known to be present in a sample. The N50 measure, defined as the length for which the collection of all contigs of that length or longer covers at least half the assembly, gives an indication of assembly contiguity. The NGA50 measure is computed in a similar fashion, but only aligned blocks are considered (obtained by breaking contigs at misassembly events and removing all unaligned bases). This measure reports the length for which the total size of all aligned blocks of this length or longer equals at least 50% of the total length of the true haplotypes; the NGA50 value is undefined if a target coverage of 50% cannot be reached. Finally, the error rates we present are computed as the sum of the N-rate (i.e. ambiguous bases) and mismatch- and indel rates (compared to the ground truth). Further assembly statistics can be found in the Supplementary Material.

### 3.3 Improvements of final haplotypes over input contigs

The first two rows of Table 1a, SAVAGE and Virus-VG, display the statistics for the input contigs and the final, maximal-length haplotypes computed here, respectively, for the HCV datasets. While SAVAGE presents 26 fragmented contigs, Virus-VG presents 10 full-length haplotypes, each of which represents one of the original haplotypes, thereby encompassing the 10 original haplotypes that established the basis for simulating reads. Further, Virus-VG covers 99.3% of the target genomes, similar to the original 99.4% provided by the input contigs, and these full-length haplotypes come at a negligible error rate of 0.001%. In summary, our approach yields near-perfect results on this (supposed to be challenging) dataset.

For the 15-strain ZIKV dataset (Table 1b) we again achieve substantial improvements in terms of haplotype assembly contiguity. We obtain 20 full-length haplotypes covering 14 out

<sup>3</sup><https://github.com/cbg-ethz/5-virus-mix>



|              | # strains* | target (%) | N50  | NGA50 | ER(%) |
|--------------|------------|------------|------|-------|-------|
| SAVAGE       | 26         | 99.4       | 8964 | 8964  | 0.001 |
| Virus-VG     | 10         | 99.3       | 9281 | 9203  | 0.001 |
| PredictHaplo | 9          | 73.8       | 7636 | 7608  | 0.059 |
| ShoRAH       | 639        | 56.9       | 7570 | 7570  | 4.294 |

(a) 10-strain HCV mixture (simulated Illumina MiSeq)

|              | # strains* | target (%) | N50   | NGA50 | ER(%) |
|--------------|------------|------------|-------|-------|-------|
| SAVAGE       | 100        | 98.8       | 2954  | 3801  | 0.023 |
| Virus-VG     | 20         | 92.8       | 10202 | 10210 | 0.115 |
| PredictHaplo | 8          | 53.3       | 10270 | 10267 | 0.126 |
| ShoRAH       | 493        | 26.3       | 10117 | 10117 | 4.392 |

(b) 15-strain ZIKV mixture (simulated Illumina MiSeq)

|              | # strains* | target (%) | N50  | NGA50 | ER(%) |
|--------------|------------|------------|------|-------|-------|
| SAVAGE       | 59         | 83.7       | 1089 | 1643  | 0.019 |
| Virus-VG     | 14         | 80.7       | 7316 | 7428  | 0.064 |
| PredictHaplo | 3          | 16.6       | 7461 | -     | 1.825 |

(c) 6-strain Poliovirus mixture (simulated Illumina MiSeq)

|              | # strains* | target (%) | N50  | NGA50 | ER(%) |
|--------------|------------|------------|------|-------|-------|
| SAVAGE       | 68         | 97.9       | 1026 | 1450  | 0.066 |
| Virus-VG     | 23         | 90.6       | 2130 | 4642  | 0.324 |
| PredictHaplo | 6          | 100.0      | 8825 | 8825  | 1.066 |
| ShoRAH       | 250        | 100.0      | 8775 | 8775  | 3.910 |

(d) Labmix: real 5-strain HIV mixture (Illumina MiSeq)

Table 1: Assembly results per dataset. ER = Error Rate, computed as the sum of the fraction of 'N's (ambiguous bases) and the mismatch- and indel rates. ShoRAH could not process the Poliovirus data. \*This column indicates the number of contigs in the assembly; if these are not full-length, this does not reflect the number of strains.

of 15 strains, while the original input contigs consisted of 89 highly fragmented, and relatively short sequences. As a result, we observe an NGA50 value of 10210 for Virus-VG, reflecting full-length haplotypes, compared to an N50 of 3801 for SAVAGE. For the 6-strain Poliovirus mixture we obtain similar results, yielding a major improvement of NGA50 values (1643 for SAVAGE compared to 7428 for Virus-VG) at the cost of a minor decrease in target haplotypes reconstructed (83.7% for SAVAGE compared to 80.7% for Virus-VG).

On both the ZIKV and Poliovirus data, we observe a slight increase in error rate after applying our method; however, Virus-VG leaves with an error rate of 0.115% (ZIKV) and 0.064% (Poliovirus), which is still extremely low. A thorough analysis turns up that this increase is due to errors in the input contigs that become more expressed only after having assembled the full-length haplotypes, so these errors are not primarily due to the method presented here. Moreover,

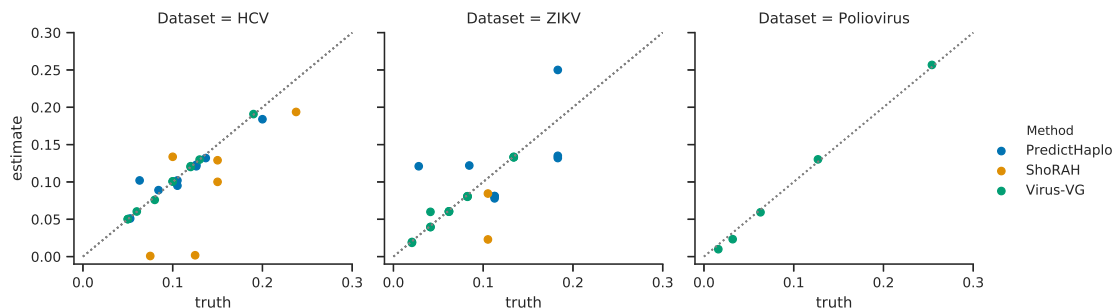

Figure 2: Haplotype abundance estimation: true frequencies versus estimated frequencies, evaluated per method, per dataset. The diagonal indicates the position of perfect estimates, i.e., estimated value equal to true value. We only plot frequencies up to 0.3 to avoid shifting the majority of points to the lower left corner due to outliers.

the full-length contiguity of the haplotypes clearly offsets the minute shift in accuracy.

Finally, we analyze performance on a real benchmark, the labmix, and observe the same behaviour for Virus-VG: a significant improvement in NGA50 values (1450 for SAVAGE compared to 4642 for Virus-VG) but also an increase in error rate (0.066 for SAVAGE compared to 0.324 for Virus-VG). However, it is important to realize that the true sequences considered here may not fully represent the sample, because extremely high mutation rates allow the virus to mutate and recombine in vitro before sequencing.

### 3.4 Comparison with the state-of-the-art

Rows 3 and 4 in Tables 1a-1d display results for state-of-the-art methods PredictHaplo (Prabhakaran *et al.*, 2014) and ShoRAH (Zagordi *et al.*, 2011), run with default parameter settings. Both of these methods are reference-guided, hence cannot immediately be compared with Virus-VG, which operates entirely de novo. To simulate a de novo type scenario for these reference-guided approaches, we provided them with a bootstrap reference genome computed by running (Yang *et al.*, 2012, VICUNA), a state-of-the-art tool for generating consensus virus genomes, on the input reads. We also tested alternative methods (Malhotra *et al.*, 2016, MLEHaplo), (Barik *et al.*, 2017, QSdpR), (Ahn and Vikalo, 2018, aBayesQR), and (Chen *et al.*, 2018, PEHaplo), but found them unsuitable for the (not at all unusual) datasets considered here, or unable to complete their jobs within 96 hours.

We first evaluated both PredictHaplo and ShoRAH on our simulated data and, in all cases, we found our method to have (quite significant) advantages, in terms of accuracy, number of strains, and strain-specific genomes covered. As was already observed earlier Baaijens *et al.* (2017), reference-guided methods greatly depend on the quality of the reference genome provided and have to deal with biases towards the reference genome. This results in error rates which are 1.1–59 times higher than Virus-VG for PredictHaplo, and more than 12 times higher than Virus-VG for ShoRAH. At the same time, these methods miss a big fraction of the target haplotypes on all data sets except the labmix.

PredictHaplo and ShoRAH both had difficulty processing the Poliovirus data. A possible explanation is the high divergence between the virus strains and the reference genome used, leading to gaps in coverage when considering alignments to the reference genome, which tends to confuse reference-guided methods. In particular, two of the six strains have a big deletion (more than 1000bp) compared to both the reference genome and the other four strains; this may also explain the failure to run ShoRAH even using a bootstrap reference genome, as well as the extremely low target reconstructed for PredictHaplo. These results again highlight the advantage of a fully de novo approach compared to reference-guided methods.

### 3.5 Haplotype abundance estimation

We also evaluated the accuracy of the abundance estimates obtained for each haplotype of the simulated data sets, since we know the exact true frequencies for each of the strains. The reconstructed sequences were aligned to the ground truth sequences and assigned to the closest matching strain. For each ground truth strain, we summed the abundance estimates of the sequences assigned to it, thus obtaining a total estimate for this strain. Then we compared this estimate to the true strain abundance and computed the absolute frequency estimation errors. In case of any missing strains, the true frequencies were normalized first, taking only the assembled sequences into account for a fair comparison.

Our method predicts highly accurate abundances for the reconstructed strains, with an average absolute estimation error of 0.1% on the HCV data, 0.3% on the ZIKV data, and 0.6% on the Poliovirus data. In comparison, PredictHaplo achieves an average absolute estimation error of 0.9% (HCV), 4.9% (ZIKV), and 10.6% (Polio), while ShoRAH is even further off with 8.5% (HCV) and 39% (ZIKV). Relative estimation errors show a similar pattern (see Supplementary Material).

Figure 2 shows the true haplotype frequencies versus the estimated frequencies per method. Note that to improve readability, outliers (frequency > 0.3) are not shown in this figure. On the Poliovirus data there are no results for ShoRAH or PredictHaplo, because the first could not process this data set while the latter found less than a single strain. On HCV and ZIKV data, however, we observe that Virus-VG outperforms the other methods in terms of frequency estimation, with estimates that are closest to the true values. An immediate interpretation of these findings is that accuracy in estimating abundance is inevitably linked with accuracy in haplotype reconstruction, which may explain our overall advantages.

## 4 Discussion

We have presented an algorithm that turns viral strain-specific contigs, such as available from a de novo assembler like SAVAGE (Baaijens *et al.*, 2017), into full-length, viral strain-specific haplotypes, without the use of a reference genome at any point. We first construct a contig variation graph, which arranges haplotype-specific contigs sampled from a viral quasispecies in a convenient and favorable manner. We then enumerate all maximal length paths through this graph that maximally concatenate the contig subpaths. Last, we solve a minimization problem that assigns abundance estimates to maximal length paths that are optimal in terms of being compatible with abundances computed for the nodes in the graph. We finally output the optimal such set of paths together with their abundances, by which *we have completed the de novo viral quasispecies assembly task*.

In benchmarking experiments, we have demonstrated that our method yields major improvements over the input contigs in terms of assembly length, while preserving high accuracy in terms of error rates. Compared to state-of-the-art viral quasispecies assemblers—all of which operate in a reference genome dependent manner—our method produces haplotype-resolved assemblies that are both more complete, in terms of haplotypes covered, and more accurate, in terms of error rates. We believe that (a) this reflects the strength of a fully *de novo* approach, because we avoid to deal with reference-induced biases. We also believe that (b) this is a result of directly integrating haplotype abundance estimation into reconstruction of haplotypes.

Still, improvements are possible. Our current optimization problem employs the absolute difference to determine the abundance estimation error. As future work, we consider the exploration of probabilistic error models, e.g., by modeling path abundance as being Poisson distributed Medvedev *et al.* (2010) and calculating the likelihood of the observed node abundances.

Further, we had already alluded to that the number of candidate paths is exponential in the number of input contigs, which could theoretically be overwhelming when dealing with highly fragmented assembly output. Our runtime benchmarks show that this is not an issue with practical datasets. Nevertheless, we will consider more efficient alternative solutions in future

work, based on a flow formulation of the problem that we recently found, yielding a yet to be implemented polynomial time algorithm.

## Funding

This work was supported by the Netherlands Organisation for Scientific Research (NWO) through Vidi grant 679.072.309.

## References

- Ahn, S. and Vikalo, H. (2018). aBayesQR: A bayesian method for reconstruction of viral populations characterized by low diversity. *J Comput Biol*, **25**, 637–648.
- Baaijens, J. *et al.* (2017). De novo assembly of viral quasispecies using overlap graphs. *Genome Res*, **27**(5), 835–848.
- Bankevich, A. *et al.* (2012). SPAdes: A new genome assembly algorithm and its applications to single-cell sequencing. *J Comp Biol*, **19**(5), 455–477.
- Barik, S. *et al.* (2017). QSdpR: Viral quasispecies reconstruction via correlation clustering. *Genomics*.
- Beerenwinkel, N. *et al.* (2012). Challenges and opportunities in estimating viral genetic diversity from next-generation sequencing data. *Front Microbio*, **3**, 239.
- Bernard, E. *et al.* (2014). Efficient RNA isoform identification and quantification from RNA-Seq data with network flows. *Bioinformatics*, **30**(17), 2447–2455.
- Chen, J. *et al.* (2018). De novo haplotype reconstruction in viral quasispecies using paired-end read guided path finding. *Bioinformatics*, page bty202.
- Di Giallonardo, F. *et al.* (2014). Full-length haplotype reconstruction to infer the structure of heterogeneous virus populations. *Nucleic Acids Res*, **42**, e115.
- Dilthey, A. *et al.* (2015). Improved genome inference in the MHC using a population reference graph. *Nat Genetics*, **47**, 682–688.
- Domingo, E. *et al.* (2012). Viral quasispecies evolution. *Microbiol Mol Biol Rev*, **76**(2), 159–216.
- Garrison, E. *et al.* (2017). Sequence variation aware genome references and read mapping with the variation graph toolkit. *bioRxiv:10.1101/234856*.
- Gurevich, A. *et al.* (2013). QUAST: quality assessment tool for genome assemblies. *Bioinformatics*, **29**(8), 1072–1075.
- Hunt, M. *et al.* (2015). IVA: accurate de novo assembly of RNA virus genomes. *Bioinformatics*, **31**(14), 2374–2376.
- Knyazev, S. *et al.* (2018). Cliquesnv: Scalable reconstruction of intra-host viral populations from ngs reads. *bioRxiv*.
- Li, H. (2018). Minimap2: pairwise alignment for nucleotide sequences. *Bioinformatics*, page bty191.
- Mäkinen, V. *et al.* (2015). *Genome-Scale Algorithm Design: Biological Sequence Analysis in the Era of High-Throughput Sequencing*. Cambridge University Press.

- Malhotra, R. *et al.* (2016). Maximum likelihood de novo reconstruction of viral populations using paired end sequencing data. arXiv:1502.04239.
- Medvedev, P. *et al.* (2010). Detecting copy number variation with mated short reads. *Genome Res*, **20**(11), 1613–1622.
- Novak, A. *et al.* (2017). A graph extension of the positional BurrowsWheeler transform and its applications. *Algorithm Mol Biol*, **12**(18).
- Paten, B. *et al.* (2017). Genome graphs and the evolution of genome inference. *Genome Res*, **27**(5), 665–676.
- Pertea, M. *et al.* (2015). StringTie enables improved reconstruction of a transcriptome from RNA-seq reads. *Nat Biotechnol*, **33**, 290–295.
- Prabhakaran, S. *et al.* (2014). HIV haplotype inference using a propagating dirichlet process mixture model. *IEEE Trans Comp Biol Bioinf*, **11**(1), 182–191.
- Prosperi, M. and Salemi, M. (2012). QuRe: software for viral quasispecies reconstruction from next-generation sequencing data. *Bioinformatics*, **28**(1), 132–133.
- Rizzi, R. *et al.* (2014). On the complexity of minimum path cover with subpath constraints for multi-assembly. *BMC Bioinformatics*, **15**(9), S5.
- Rose, R. *et al.* (2016). Challenges in the analysis of viral metagenomes. *Virus Evolution*, **2**(2).
- Rosen, Y. *et al.* (2017). Modelling haplotypes with respect to reference cohort variation graphs. *Bioinformatics*, **33**(14), i118–i123.
- Tomescu, A. I. *et al.* (2013). A novel min-cost flow method for estimating transcript expression with RNA-Seq. *BMC Bioinformatics*, **14**(5), S15.
- Töpfer, A. *et al.* (2013). Probabilistic inference of viral quasispecies subject to recombination. *J Comput Biol*, **20**(2), 113–123.
- Töpfer, A. *et al.* (2014). Viral quasispecies assembly via maximal clique enumeration. *PLoS Comput Biol*, **10**(3), e1003515.
- Trapnell, C. *et al.* (2010). Transcript assembly and quantification by RNA-Seq reveals unannotated transcripts and isoform switching during cell differentiation. *Nat Biotechnol*, **28**, 511–515.
- Yang, X. *et al.* (2012). De novo assembly of highly diverse viral populations. *BMC Genomics*, **13**(1), 475.
- Zagordi, O. *et al.* (2011). ShoRAH: estimating the genetic diversity of a mixed sample from next-generation sequencing data. *BMC Bioinformatics*, **12**(1), 119.
